# Supplementary material for: Sexual Dysfunction of Patients with Diffuse Low-Grade Glioma: A Qualitative Review of a Neglected Concern
Source: MDPI journal article supplement (doi:10.3390/cancers14123025), 2022-06-20
Supplement: s1 [file s1]

# Sexual Dysfunction of Patients with Diffuse Low-Grade Glioma: A Qualitative Review of a Neglected Concern

Arnaud Lombard <sup>1,2</sup> and Hugues Duffau <sup>3,4,\*</sup>

**Table S1.** Search strategy used in identifying articles from major scientific databases.

| Database           | Search terms                                                                                                                                                                                                                                    | Items found |
|--------------------|-------------------------------------------------------------------------------------------------------------------------------------------------------------------------------------------------------------------------------------------------|-------------|
| PUBMED             | (1) "sexual activity" OR "sexual disorder" OR "sexual dysfunction" OR "sexual sphere" OR "sexual health" OR "sexuality"                                                                                                                         | 57016       |
|                    | (2) "low grade glioma" OR "glioma" OR "LGG" OR "astrocytoma" OR "oligodendroglioma" OR "diffuse glioma" OR "brain tumor"                                                                                                                        | 84401       |
|                    | (1) And (2)                                                                                                                                                                                                                                     | 16          |
| SCOPUS             | (1) "sexual activity" OR "sexual disorder" OR "sexual dysfunction" OR "sexual sphere" OR "sexual health" OR "sexuality"                                                                                                                         | 458023      |
|                    | (2) "low grade glioma" OR "glioma" OR "LGG" OR "astrocytoma" OR "oligodendroglioma" OR "diffuse glioma" OR "brain tumor"                                                                                                                        | 617239      |
|                    | (1) And (2)                                                                                                                                                                                                                                     | 1217        |
| COCHRANE           | (1) "sexual activity" OR "sexual disorder" OR "sexual dysfunction" OR "sexual sphere" OR "sexual health" OR "sexuality"                                                                                                                         | 21527       |
|                    | (2) "low grade glioma" OR "glioma" OR "LGG" OR "astrocytoma" OR "oligodendroglioma" OR "diffuse glioma" OR "brain tumor"                                                                                                                        | 6595        |
|                    | (1) And (2)                                                                                                                                                                                                                                     | 26          |
| Clinicaltrials.gov | ("sexual activity" OR "sexual disorder" OR "sexual dysfunction" OR "sexual sphere" OR "sexual health" OR "sexuality") AND ("sexual activity" OR "sexual disorder" OR "sexual dysfunction" OR "sexual sphere" OR "sexual health" OR "sexuality") | 10          |
